# Supplementary material for: Two In-MOFs with gas adsorption and separation capability based on different pyridinyl carboxylate linkers
Source: Royal Society of Chemistry journal article supplement (doi:10.1039/d3ce01034a), 2024-01-01
Supplement: d3ce01034a1.pdf [file d3ce01034a1.pdf]

Electronic Supporting Information

## Two cases of In-MOFs with gas adsorption and separation capability based on different pyridinyl carboxylate linkers

Fei Liang<sup>ac1</sup>, Jiaqi Liang<sup>a1</sup>, Dan Gao<sup>b</sup>, Lingheng Kong<sup>d</sup>, Shuo Huang<sup>c</sup>, Yayuan Guo<sup>c</sup>, Changkui Liu<sup>c\*</sup>, Tao Ding<sup>b\*</sup>

<sup>a</sup> School of Pharmacy, Xi'an Medical University, Xi'an, 710021, China

<sup>b</sup> School of Environmental and Chemical Engineering, Xi'an Polytechnic University, Xi'an, 710048 China

<sup>c</sup> Research Center of Tooth and Maxillofacial Tissue Regeneration and Restoration, School of Stomatology, Xi'an Medical University, Xi'an, Shaanxi 710021, China

<sup>d</sup> School of Basic Medicine, Xi'an Medical University, Xi'an, 710021, China

<sup>1</sup> These authors contributed equally to this work and should be considered co-first authors.

**Table S1 Selected Bond Length (Å) and Angles (°) for In-MOF 1 and In-MOF 2**

| <b>In-MOF 1</b> |           |              |           |
|-----------------|-----------|--------------|-----------|
| In(3)-O(7)      | 2.055(7)  | In(3)-O(2)#1 | 2.182(5)  |
| In(3)-O(2)#2    | 2.182(5)  | In(3)-O(1)#3 | 2.165(5)  |
| In(3)-O(1)#4    | 2.165(5)  | In(3)-O(8)   | 2.127(9)  |
| In(2)-O(7)      | 1.987(14) | In(2)-O(3)#1 | 2.148(6)  |
| In(2)-O(3)      | 2.148(6)  | In(2)-O(3)#2 | 2.148(6)  |
| In(2)-O(3)#5    | 2.148(6)  | In(2)-O(6)   | 2.230(13) |
| In(1)-O(5)#6    | 2.128(6)  | In(1)-O(5)#7 | 2.128(6)  |
| In(1)-O(5)      | 2.128(6)  | In(1)-O(5)#8 | 2.128(6)  |
| In(1)-O(4)      | 2.559(7)  | In(1)-O(4)#7 | 2.559(7)  |

|                     |           |                     |           |
|---------------------|-----------|---------------------|-----------|
| In(1)-O(4)#8        | 2.559(7)  | In(1)-O(4)#6        | 2.559(7)  |
| O(7)-In(3)-O(2)#2   | 96.2(3)   | O(7)-In(3)-O(2)#1   | 96.2(3)   |
| O(7)-In(3)-O(1)#4   | 92.0(3)   | O(7)-In(3)-O(1)#3   | 92.0(3)   |
| O(7)-In(3)-O(8)     | 176.1(4)  | O(2)#2-In(3)-O(2)#1 | 82.4(3)   |
| O(1)#4-In(3)-O(2)#1 | 169.7(2)  | O(1)#3-In(3)-O(2)#1 | 90.5(2)   |
| O(1)#4-In(3)-O(2)#2 | 90.5(2)   | O(1)#3-In(3)-O(2)#2 | 95.6(3)   |
| O(8)-In(3)-O(2)#2   | 86.7(2)   | O(8)-In(3)-O(2)#1   | 86.7(2)   |
| O(8)-In(3)-O(1)#4   | 85.5(2)   | O(8)-In(3)-O(1)#3   | 85.5(2)   |
| O(7)-In(2)-O(3)#5   | 93.71(16) | O(7)-In(2)-O(3)#2   | 93.71(16) |
| O(7)-In(2)-O(3)     | 93.71(16) | O(7)-In(2)-O(3)#1   | 93.71(16) |
| O(7)-In(2)-O(6)     | 180.0     | O(3)#1-In(2)-O(3)#2 | 87.2(3)   |
| O(3)#5-In(2)-O(3)#2 | 92.4(3)   | O(3)#5-In(2)-O(3)#1 | 172.6(3)  |
| O(3)#1-In(2)-O(3)   | 87.1(3)   | O(3)#2-In(2)-O(3)   | 172.6(3)  |
| O(3)#1-In(2)-O(6)   | 86.29(16) | O(3)#5-In(2)-O(6)   | 86.29(16) |
| O(3)-In(2)-O(6)     | 86.29(16) | O(3)#2-In(2)-O(6)   | 86.29(16) |
| O(5)-In(1)-O(5)#8   | 78.9(4)   | O(5)-In(1)-O(5)#6   | 137.4(4)  |
| O(5)#6-In(1)-O(5)#7 | 78.9(4)   | O(5)#6-In(1)-O(5)#8 | 117.1(4)  |
| O(5)-In(1)-O(5)#7   | 117.2(4)  | O(5)#8-In(1)-O(5)#7 | 137.4(4)  |
| O(5)-In(1)-O(4)     | 56.1(3)   | O(5)-In(1)-O(4)#7   | 85.3(2)   |
| O(5)#6-In(1)-O(4)#6 | 56.1(3)   | O(5)#6-In(1)-O(4)   | 89.2(3)   |
| O(5)#7-In(1)-O(4)#7 | 56.1(3)   | O(5)#8-In(1)-O(4)   | 130.8(3)  |
| O(5)#7-In(1)-O(4)#6 | 130.8(3)  | O(5)#7-In(1)-O(4)   | 85.3(2)   |
| O(5)#6-In(1)-O(4)#7 | 130.8(3)  | O(5)-In(1)-O(4)#8   | 130.8(3)  |
| O(5)-In(1)-O(4)#6   | 89.2(3)   | O(5)#6-In(1)-O(4)#8 | 85.3(2)   |
| O(5)#8-In(1)-O(4)#6 | 85.3(2)   | O(5)#8-In(1)-O(4)#8 | 56.1(3)   |
| O(5)#7-In(1)-O(4)#8 | 89.2(3)   | O(5)#8-In(1)-O(4)#7 | 89.2(3)   |

Symmetry code: #1  $-y+3/2, -x+3/2, z$ ; #2  $-x+3/2, -y+3/2, z$ ; #3  $y+1/2, -x+1, -z+3/2$ ; #4  $-x+1/2, y+1, -z+3/2$ ; #5  $y, x, z$ ; #6  $-y+1, -x+1, -z+1$ ; #7  $-x+2/3, -y+1/2, z$ ; #8  $y+1/2, x+1/2, -z+1$ ; #9  $-y+1, x-1/2, -z+3/2$ .

---

## In-MOF 2

---

|                   |           |                     |           |
|-------------------|-----------|---------------------|-----------|
| In(1)-O(8)#1      | 2.130(14) | In(1)-O(4)          | 2.139(15) |
| In(1)-O(6)        | 2.205(17) | In(1)-N(1)#2        | 2.308(19) |
| In(1)-O(1)        | 2.397(17) | In(1)-O(2)          | 2.40(2)   |
| In(1)-O(5)        | 2.40(2)   | In(1)-O(3)          | 2.57(2)   |
| O(8)#1-In(1)-O(4) | 146.3(8)  | O(8)#1-In(1)-O(6)   | 100.9(6)  |
| O(4)-In(1)-O(6)   | 88.9(7)   | O(8)#1-In(1)-N(1)#2 | 89.1(6)   |
| O(4)-In(1)-N(1)#2 | 124.3(7)  | O(6)-In(1)-N(1)#2   | 82.8(6)   |
| O(8)#1-In(1)-O(1) | 93.7(6)   | O(4)-In(1)-O(1)     | 89.1(7)   |
| O(6)-In(1)-O(1)   | 156.6(6)  | N(1)#2-In(1)-O(1)   | 79.1(6)   |
| O(8)#1-In(1)-O(2) | 79.2(7)   | O(4)-In(1)-O(2)     | 75.5(8)   |
| O(6)-In(1)-O(5)   | 56.1(7)   | N(1)#2-In(1)-O(5)   | 134.9(7)  |
| O(1)-In(1)-O(5)   | 134.9(7)  | O(1)-In(1)-O(5)     | 145.3(7)  |
| O(2)-In(1)-O(5)   | 91.5(8)   | O(8)#1-In(1)-O(3)   | 162.6(7)  |
| O(4)-In(1)-O(3)   | 50.4(7)   | O(6)-In(1)-O(3)     | 81.0(7)   |
| N(1)#2-In(1)-O(3) | 73.9(6)   | O(1)-In(1)-O(3)     | 79.7(7)   |
| O(2)-In(1)-O(3)   | 112.4(8)  |                     |           |

Symmetry code: #1  $x+1/2, y-3/2, z+1/2$ ; #2  $-x+3/2, y+1/2, -z+5/2$ ; #3  $x+1/2, -y+3/2, z-1/2$ ; #4  $-x+3/2, y-1/2, -z+5/2$ ; #5  $x-1/2, -y+3/2, z+1/2$ ; #6  $x-1/2, -y+3/2, z-1/2$ .

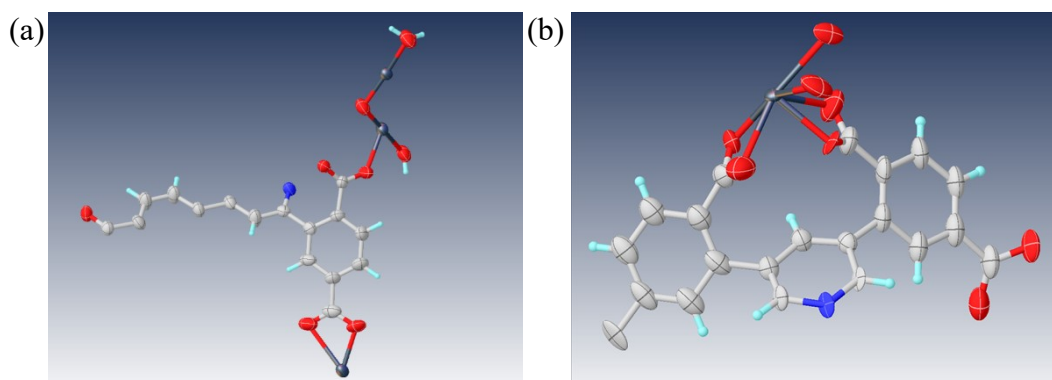

**Fig. S1** The structural drawing showing ADPs of (a) In-MOF 1 and (b) In-MOF 2.

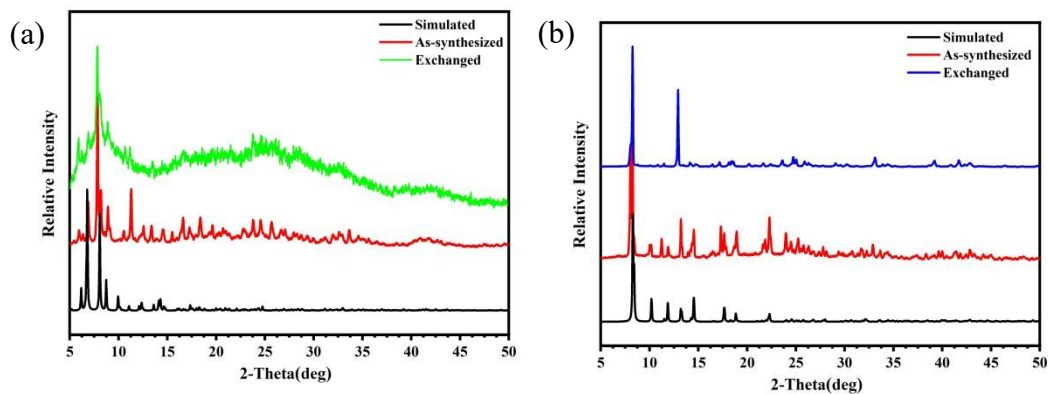

**Fig. S2** PXRD patterns for (a) In-MOF 1 and (b) In-MOF 2: Simulated, as-synthesized, solvent exchange samples.

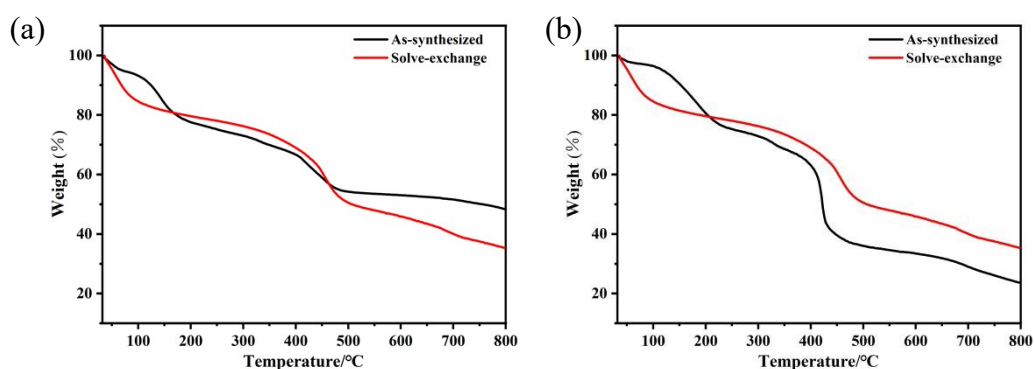

**Fig. S3** The TGA curve of (a) In-MOF 1 and (b) In-MOF 2.

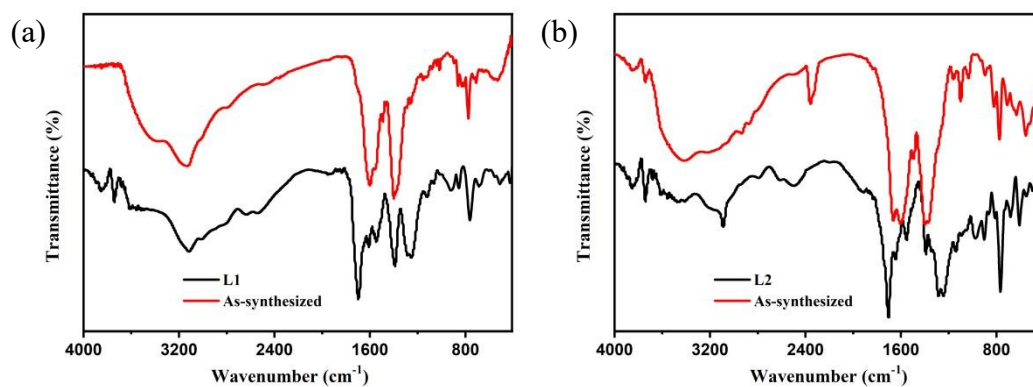

**Fig. S4** IR for (a) In-MOF 1 and (b) In-MOF 2: ligand and as-synthesized samples.

### IAST adsorption selectivity calculation

The experimental isotherm data for pure  $C_2H_2$ ,  $CO_2$  and  $CH_4$  (measured at 298 K) were fitted using a Langmuir-Freundlich (L-F) model

$$q = \frac{a * b * p^c}{1 + b * p^c}$$

Where  $q$  and  $p$  are adsorbed amounts and pressures of component  $i$ , respectively. The adsorption selectivities for binary mixtures of  $C_2H_2/CH_4$  and  $CO_2/CH_4$ , defined by

$$S_{i/j} = \frac{(x_i * y_j)}{(x_j * y_i)}$$

were calculated using the Ideal Adsorption Solution Theory (IAST) of Myers and Prausnitz.

Where  $x_i$  the mole fraction of component  $i$  in the adsorbed phase and  $y_i$  is the mole fraction of component  $i$  in the bulk.

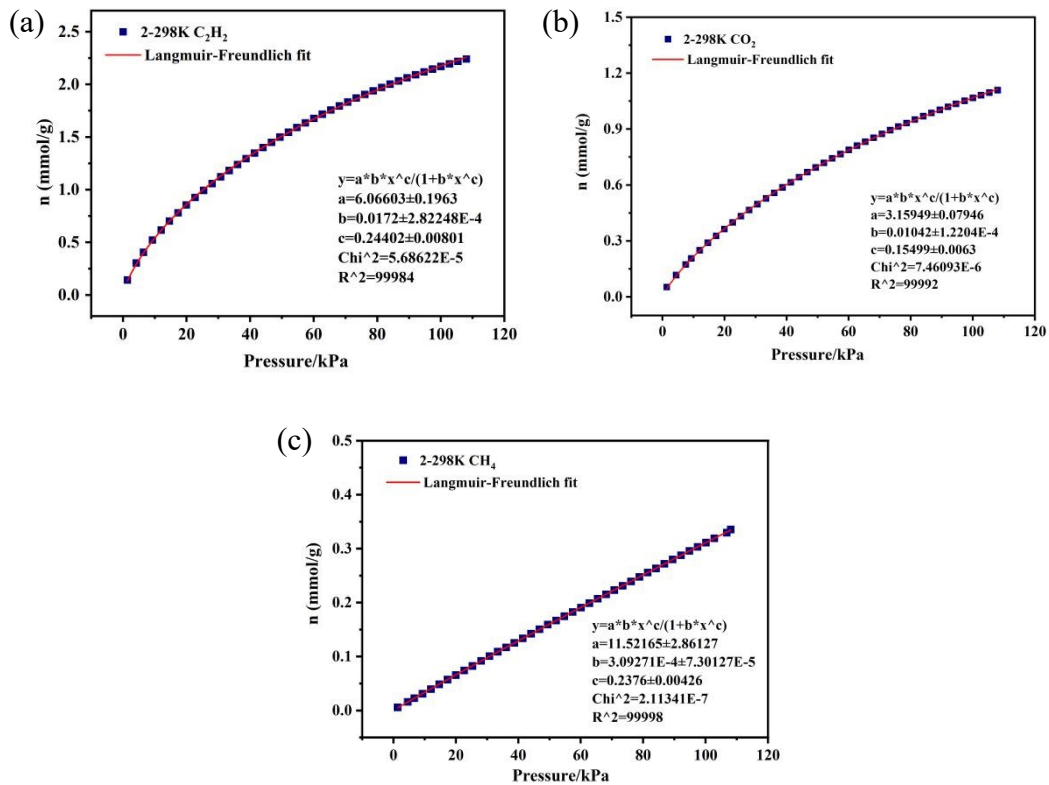

**Fig. S5** (a)  $C_2H_2$ , (b)  $CO_2$  and (c)  $CH_4$  adsorption isotherms of In-MOF 1 at 298 K with fitting by L-F model

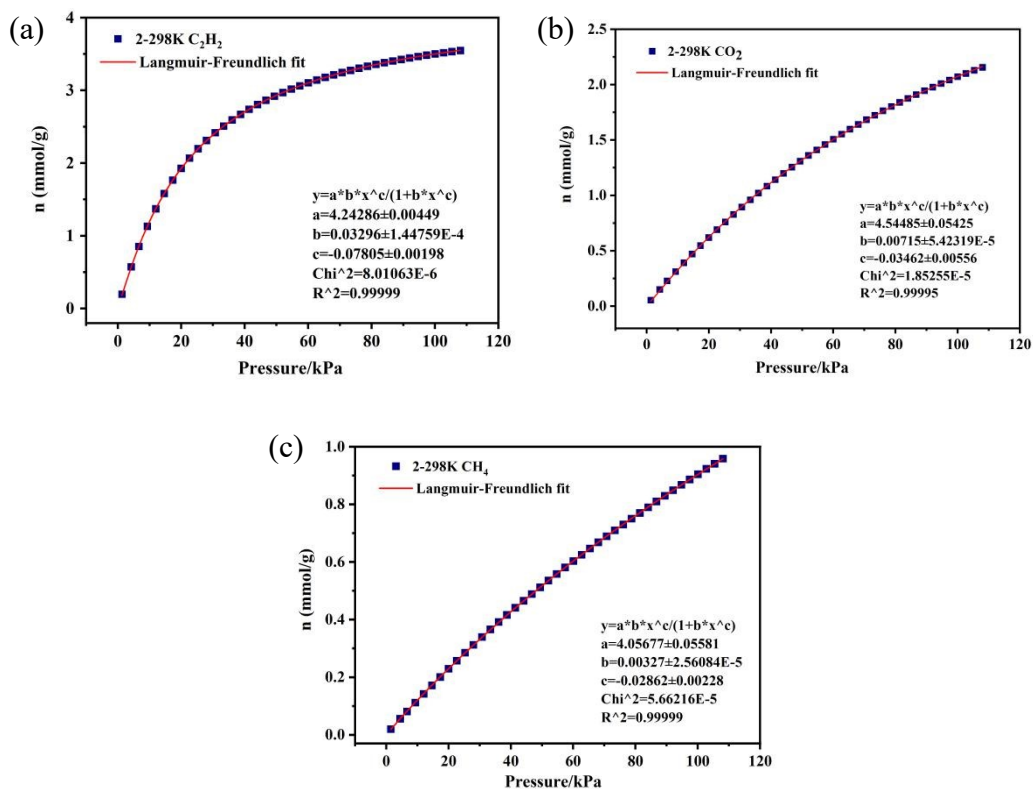

**Fig. S6** (a) C<sub>2</sub>H<sub>2</sub>, (b) CO<sub>2</sub> and (c) CH<sub>4</sub> adsorption isotherms of In-MOF 2 at 298 K with fitting by L-F model

### Calculation of sorption heat for C<sub>2</sub>H<sub>2</sub> and CO<sub>2</sub> uptakes using Virial 2 model

The above equation was applied to fit the combined C<sub>2</sub>H<sub>2</sub> and CO<sub>2</sub> and isotherm data for desolvated **1a** at 273 and 298 K, where  $P$  is the pressure,  $N$  is the adsorbed amount,  $T$  is the temperature,  $a_i$  and  $b_i$  are virial coefficients, and  $m$  and  $n$  are the number of coefficients used to describe the isotherms.  $Q_{st}$  is the coverage-dependent enthalpy of adsorption and  $R$  is the universal gas constant.

$$\ln P = \ln N + 1/T \sum_{i=0}^m a_i N^i + \sum_{i=0}^n b_i N^i Q_{st} = -R \sum_{i=0}^m a_i N^i$$

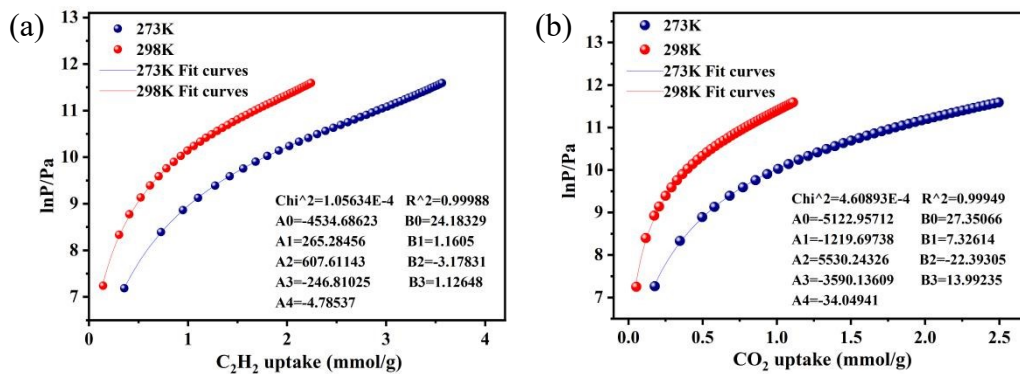

**Fig. S7** Virial analysis of the  $C_2H_2$  and  $CO_2$  adsorption data at 273 K and 298 K for In-MOF 1.

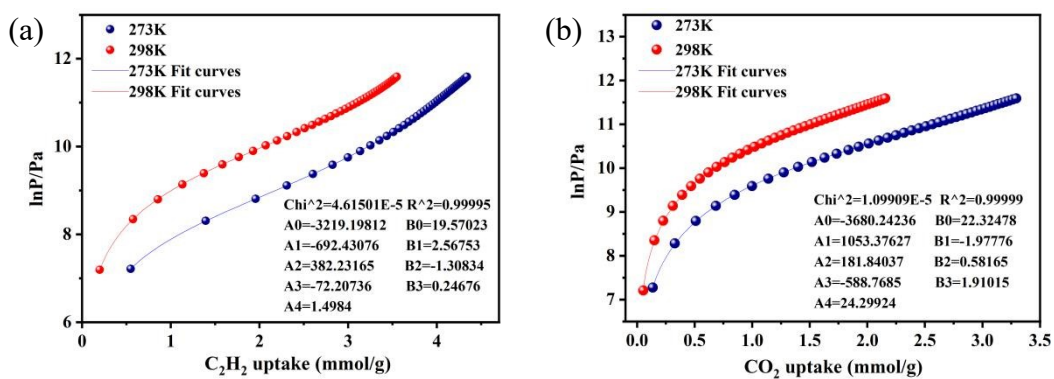

**Fig. S8** Virial analysis of the  $C_2H_2$  and  $CO_2$  adsorption data at 273 K and 298 K for In-MOF 2.
